# Supplementary material
Source: MDPI journal article supplement (https://www.mdpi.com/2073-4441/15/17/3133)
Supplement: s1 [file s1]

# Glass Eel Restocking Experiments in Typologically Different Upland Rivers: How Much Have We Learned about the Importance of Recipient Habitats?

**Supplementary Figure S1.** Total length according to age and river. n indicates the number of eels measured (Kruskal–Wallis and Dunn’s tests,  $p < 0.05$ ).

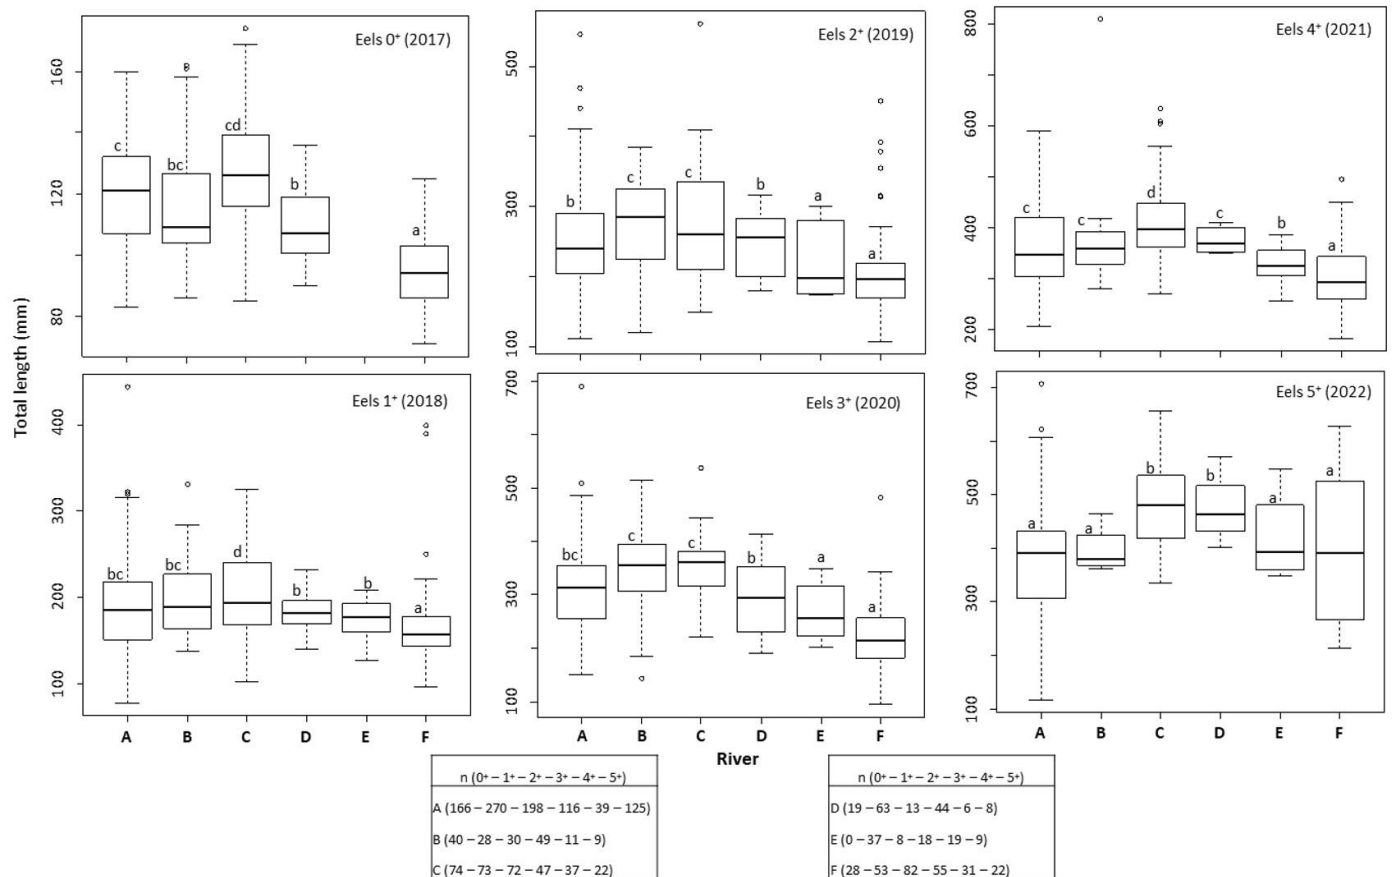

**Supplementary Table S1.** Detailed eel recruitment parameters of Jolly-Seber model. B-hat and B\*-hat were assessed between sampling occasions. CI means confidence interval and SE indicates standard error.

| River | Sector | Glass eel release (n) | Sampling occasion | Survey date  | Age | Time Interval (Months) | Overall population |          | Superpopulation |           | Abundance     |          | Net Emigration |              | Net Immigration (B-hat) |              |
|-------|--------|-----------------------|-------------------|--------------|-----|------------------------|--------------------|----------|-----------------|-----------|---------------|----------|----------------|--------------|-------------------------|--------------|
|       |        |                       |                   |              |     |                        | (N)                |          | (N*-hat)        |           | (N-hat)       |          | (B*-hat)       |              | Net Immigration (B-hat) |              |
|       |        |                       |                   |              |     |                        | Estimate ± SE      | 95% CI   | Estimate ± SE   | 95% CI    | Estimate ± SE | 95% CI   | Estimate ± SE  | 95% CI       | Estimate ± SE           | 95% CI       |
| A     | 2      | 1586                  | 1                 | 08 Sep. 2017 | 0*  | 0                      | 1260 ± 233         | 908–1848 | 1493 ± 216      | 1126–1979 | 690 ± 208     | 388–1229 | -              | -            | -                       | -            |
|       |        |                       | 2                 | 25 Sep. 2018 | 1*  | 12.6                   |                    |          |                 |           | 647 ± 187     | 372–1126 | 454 ± 98       | 300–689      | 320 ± 69                | 211–485      |
|       |        |                       | 3                 | 24 Sep. 2019 | 2*  | 12                     |                    |          |                 |           | 410 ± 120     | 235–719  | 130 ± 84       | 41–416       | 93 ± 56                 | 32–275       |
|       |        |                       | 4                 | 23 Sep. 2020 | 3*  | 12                     |                    |          |                 |           | 358 ± 111     | 198–646  | 218 ± 61       | 127–373      | 156 ± 44                | 91–269       |
|       | 10     | 1586                  | 1                 | 10 Sep. 2018 | 1*  | 0                      | 146 ± 22           | 124–222  | 181 ± 19        | 147–223   | 85 ± 22       | 51–141   | -              | -            | -                       | -            |
|       |        |                       | 2                 | 10 Oct. 2019 | 2*  | 16.3                   |                    |          |                 |           | 87 ± 22       | 55–144   | 92 ± 17        | 65–130       | 58 ± 11                 | 40–84        |
|       |        |                       | 3                 | 30 Sep. 2020 | 3*  | 10.6                   |                    |          |                 |           | 49 ± 13       | 30–81    | 5 ± 12         | 0.3–72       | 3 ± 8                   | 0.224–52     |
|       |        |                       |                   |              |     |                        |                    |          |                 |           |               |          |                |              |                         |              |
|       | 1      | 1894                  | 1                 | 18 Sep. 2018 | 1*  | 0                      | 209 ± 114          | 92–605   | 232 ± 124       | 87–620    | 128 ± 74      | 44–368   | -              | -            | -                       | -            |
|       |        |                       | 2                 | 18 Sep. 2019 | 2*  | 12                     |                    |          |                 |           | 76 ± 58       | 21–285   | <0,001 ± 0.035 | <0,001–0.037 | <0,001 ± 0.027          | <0,001–0.029 |
|       |        |                       | 3                 | 08 Sep. 2020 | 3*  | 12.3                   |                    |          |                 |           | 126 ± 81      | 40–400   | 104 ± 64       | 34–317       | 81 ± 49                 | 27–244       |
|       |        |                       |                   |              |     |                        |                    |          |                 |           |               |          |                |              |                         |              |
| B     | 2      | 1894                  | 1                 | 19 Sep. 2018 | 1*  | 0                      | 58 ± 0             | 58–58    | 134 ± 23        | 97–186    | 9 ± 3         | 5–16     | -              | -            | -                       | -            |
|       |        |                       | 2                 | 17 Sep. 2019 | 2*  | 11.9                   |                    |          |                 |           | 20 ± 4        | 14–28    | 49 ± 13        | 30–80        | 19 ± 4                  | 13–27        |
|       |        |                       | 3                 | 11 Sep. 2020 | 3*  |                        |                    |          |                 |           | 32 ± 4        | 26–40    | 77 ± 17        | 50–117       | 30 ± 4                  | 23–38        |
|       |        |                       |                   |              |     |                        |                    |          |                 |           |               |          |                |              |                         |              |
|       | 2      | 1586                  | 1                 | 04 Oct. 2017 | 0*  | 0                      | 87 ± 0             | 87–87    | 198 ± 32        | 145–270   | 55 ± 5        | 47–65    | -              | -            | -                       | -            |
|       |        |                       | 2                 | 26 Sep. 2019 | 2*  | 23.7                   |                    |          |                 |           | 26 ± 5        | 19–36    | 127 ± 32       | 78–207       | 26 ± 4                  | 19–36        |
|       |        |                       | 3                 | 06 Oct. 2020 | 3*  | 12.1                   |                    |          |                 |           | 8 ± 3         | 5–15     | 16 ± 7         | 7–36         | 6 ± 2                   | 3–13         |
|       |        |                       |                   |              |     |                        |                    |          |                 |           |               |          |                |              |                         |              |
|       | 8      | 1586                  | 1                 | 04 Oct. 2018 | 1*  | 0                      | 145 ± 50           | 115–389  | 214 ± 53        | 133–345   | 60 ± 27       | 26–139   | -              | -            | -                       | -            |
|       |        |                       | 2                 | 01 Oct. 2019 | 2*  | 11.9                   |                    |          |                 |           | 68 ± 29       | 30–151   | 93 ± 23        | 58–151       | 52 ± 18                 | 27–99        |
|       |        |                       | 3                 | 29 Sep. 2020 | 3*  | 11.9                   |                    |          |                 |           | 51 ± 23       | 22–118   | 61 ± 16        | 37–100       | 34 ± 11                 | 18–62        |
|       |        |                       |                   |              |     |                        |                    |          |                 |           |               |          |                |              |                         |              |
| D     | 3      | 2846                  | 1                 | 10 Oct. 2018 | 1*  | 0                      | 196 ± 47           | 138–336  | 235 ± 56        | 148–373   | 138 ± 34      | 86–222   | -              | -            | -                       | -            |
|       |        |                       | 2                 | 15 Oct. 2019 | 2*  | 12.2                   |                    |          |                 |           | 42 ± 14       | 22–80    | <0.001 ± 0.013 | <0.001–0.015 | <0.001 ± 0.007          | <0.001–0.008 |
|       |        |                       | 3                 | 25 Sep. 2020 | 3*  | 11.3                   |                    |          |                 |           | 72 ± 21       | 41–127   | 97 ± 29        | 55–173       | 59 ± 18                 | 33–104       |
|       |        |                       |                   |              |     |                        |                    |          |                 |           |               |          |                |              |                         |              |
| E     | 1      | 529                   | 1                 | 05 Sep. 2018 | 1*  | 0                      | 341 ± 231          | 129–1211 | 411 ± 276       | 124–1360  | 241 ± 166     | 72–815   | -              | -            | -                       | -            |
|       |        |                       | 2                 | 23 Oct. 2019 | 2*  | 13.6                   |                    |          |                 |           | 59 ± 48       | 14–240   | <0.001 ± 0.117 | <0.001–0.103 | <0.001 ± 0.063          | <0.001–0.055 |
|       |        |                       | 3                 | 15 Sep. 2020 | 3*  | 11.4                   |                    |          |                 |           | 118 ± 85      | 33–417   | 170 ± 120      | 49–590       | 100 ± 71                | 28–350       |
|       |        |                       |                   |              |     |                        |                    |          |                 |           |               |          |                |              |                         |              |
| F     | 2      | 4405                  | 1                 | 16 Oct. 2018 | 1*  | 0                      | 234 ± 88           | 176–640  | 355 ± 91        | 217–582   | 79 ± 38       | 32–192   | -              | -            | -                       | -            |
|       |        |                       | 2                 | 28 Aug. 2019 | 2*  | 10.4                   |                    |          |                 |           | 127 ± 57      | 54–295   | 172 ± 46       | 103–287      | 102 ± 39                | 50–209       |
|       |        |                       | 3                 | 17 Sep. 2020 | 3*  | 13.6                   |                    |          |                 |           | 81 ± 39       | 33–200   | 104 ± 23       | 68–160       | 54 ± 17                 | 30–98        |
|       |        |                       |                   |              |     |                        |                    |          |                 |           |               |          |                |              |                         |              |
